# Supplementary material
Source: PubMed Central journal article supplement (PMC5180461)
Supplement: DC161358SupplementaryData.pdf [file DC161358SupplementaryData.pdf]

SUPPLEMENTARY DATA

**Supplementary Table S1. Pairwise Spearman Correlations of HbA1c with Fasting Plasma Glucose and 2-hour Plasma Glucose in child and adult cohorts.**

|                 | <b>Boys/Men</b> |            |             | <b>Girls/Women</b> |            |             |
|-----------------|-----------------|------------|-------------|--------------------|------------|-------------|
| <b>Children</b> | <b>HbA1c</b>    | <b>FPG</b> | <b>2hPG</b> | <b>HbA1c</b>       | <b>FPG</b> | <b>2hPG</b> |
| <b>HbA1c</b>    | 1               | 0.13       | 0.12        | 1                  | 0.16       | 0.17        |
| <b>FPG</b>      |                 | 1          | 0.37        |                    | 1          | 0.45        |
| <b>2hPG</b>     |                 |            | 1           |                    |            | 1           |
| <b>Adults</b>   | <b>HbA1c</b>    | <b>FPG</b> | <b>2hPG</b> | <b>HbA1c</b>       | <b>FPG</b> | <b>2hPG</b> |
| <b>HbA1c</b>    | 1               | 0.28       | 0.22        | 1                  | 0.27       | 0.21        |
| <b>FPG</b>      |                 | 1          | 0.41        |                    | 1          | 0.43        |
| <b>2hPG</b>     |                 |            | 1           |                    |            | 1           |

All correlations were significant with  $p < 0.0001$

SUPPLEMENTARY DATA

**Supplementary Table S2. Areas under the ROC curve (AUCs) for prediction of diabetes (time-to-event analysis).** P-values indicate significance of the difference of the AUC from that of HbA1c.

|                                                           | TEST  | MALES                   | FEMALES                          |
|-----------------------------------------------------------|-------|-------------------------|----------------------------------|
| <b>CHILDREN</b><br>(227 cases/<br>13,528 person<br>years) | HbA1c | 0.65<br>--              | 0.72<br>--                       |
|                                                           | FPG   | 0.58<br><i>p</i> = 0.15 | 0.67<br><i>p</i> = 0.13          |
|                                                           | 2hPG  | 0.68<br><i>p</i> = 0.48 | 0.75<br><i>p</i> = 0.33          |
| <b>ADULTS</b><br>(536 cases/<br>11,520 person<br>years)   | HbA1c | 0.66<br>--              | 0.63<br>--                       |
|                                                           | FPG   | 0.64<br><i>p</i> = 0.31 | 0.66<br><i>p</i> = 0.11          |
|                                                           | 2hPG  | 0.65<br><i>p</i> = 0.52 | 0.70<br><i>p</i> = <b>0.0012</b> |

SUPPLEMENTARY DATA

**Supplementary Table S3. Sensitivities and Specificities at HbA1c, FPG, and 2hPG thresholds, within age-sex cohorts.**

**Boys (n=941)**

| HbA1c     |             |             | FPG       |             |             | 2-hPG     |             |             |
|-----------|-------------|-------------|-----------|-------------|-------------|-----------|-------------|-------------|
| Threshold | Sensitivity | Specificity | Threshold | Sensitivity | Specificity | Threshold | Sensitivity | Specificity |
| 3.4       | 1.00        | 0.00        | 64        | 1.00        | 0.00        | 45        | 1.00        | 0.00        |
| 3.5       | 1.00        | 0.00        | 66        | 1.00        | 0.00        | 50        | 0.99        | 0.00        |
| 3.6       | 1.00        | 0.00        | 68        | 1.00        | 0.00        | 55        | 0.98        | 0.01        |
| 3.7       | 1.00        | 0.00        | 70        | 1.00        | 0.00        | 60        | 0.96        | 0.02        |
| 3.8       | 1.00        | 0.00        | 72        | 1.00        | 0.00        | 65        | 0.97        | 0.05        |
| 3.9       | 1.00        | 0.01        | 74        | 1.00        | 0.01        | 70        | 0.96        | 0.07        |
| 4.0       | 1.00        | 0.01        | 76        | 1.00        | 0.01        | 75        | 0.95        | 0.13        |
| 4.1       | 1.00        | 0.02        | 78        | 0.98        | 0.02        | 80        | 0.91        | 0.18        |
| 4.2       | 0.99        | 0.03        | 80        | 0.96        | 0.04        | 85        | 0.88        | 0.25        |
| 4.3       | 0.98        | 0.07        | 82        | 0.93        | 0.08        | 90        | 0.82        | 0.35        |
| 4.4       | 0.98        | 0.10        | 84        | 0.89        | 0.14        | 95        | 0.74        | 0.44        |
| 4.5       | 0.93        | 0.14        | 86        | 0.81        | 0.23        | 100       | 0.67        | 0.54        |
| 4.6       | 0.86        | 0.18        | 88        | 0.74        | 0.32        | 105       | 0.58        | 0.63        |
| 4.7       | 0.84        | 0.25        | 90        | 0.60        | 0.43        | 110       | 0.52        | 0.71        |
| 4.8       | 0.79        | 0.34        | 92        | 0.54        | 0.57        | 115       | 0.40        | 0.78        |
| 4.9       | 0.70        | 0.42        | 94        | 0.44        | 0.69        | 120       | 0.30        | 0.84        |
| 5.0       | 0.69        | 0.55        | 96        | 0.36        | 0.77        | 125       | 0.24        | 0.89        |
| 5.1       | 0.62        | 0.65        | 98        | 0.26        | 0.84        | 130       | 0.17        | 0.91        |
| 5.2       | 0.51        | 0.76        | 100       | 0.14        | 0.89        | 135       | 0.14        | 0.94        |
| 5.3       | 0.33        | 0.84        | 102       | 0.14        | 0.93        | 140       | 0.13        | 0.96        |
| 5.4       | 0.28        | 0.91        | 104       | 0.09        | 0.95        | 145       | 0.11        | 0.97        |
| 5.5       | 0.21        | 0.94        | 106       | 0.06        | 0.97        | 150       | 0.10        | 0.99        |
| 5.6       | 0.12        | 0.98        | 108       | 0.05        | 0.98        | 155       | 0.07        | 0.99        |
| 5.7       | 0.08        | 1.00        | 110       | 0.02        | 0.99        | 160       | 0.06        | 0.99        |
| 5.8       | 0.06        | 1.00        | 112       | 0.02        | 0.99        | 165       | 0.05        | 0.99        |
| 5.9       | 0.04        | 1.00        | 114       | 0.01        | 1.00        | 170       | 0.05        | 1.00        |
| 6.0       | 0.00        | 1.00        | 116       | 0.01        | 1.00        | 175       | 0.02        | 1.00        |
| 6.1       | 0.00        | 1.00        | 118       | 0.00        | 1.00        | 180       | 0.00        | 1.00        |
| 6.2       | 0.00        | 1.00        | 120       | 0.00        | 1.00        | 185       | 0.00        | 1.00        |
| 6.3       | 0.00        | 1.00        | 122       | 0.00        | 1.00        | 190       | 0.00        | 1.00        |
| 6.4       | 0.00        | 1.00        | 124       | 0.00        | 1.00        | 195       | 0.00        | 1.00        |

**Girls (n=1154)**

| HbA1c     |             |             | FPG       |             |             | 2-hPG     |             |             |
|-----------|-------------|-------------|-----------|-------------|-------------|-----------|-------------|-------------|
| Threshold | Sensitivity | Specificity | Threshold | Sensitivity | Specificity | Threshold | Sensitivity | Specificity |
| 3.4       | 1.00        | 0.00        | 64        | 1.00        | 0.00        | 45        | 1.00        | 0.00        |
| 3.5       | 1.00        | 0.00        | 66        | 1.00        | 0.00        | 50        | 1.00        | 0.00        |
| 3.6       | 1.00        | 0.00        | 68        | 1.00        | 0.00        | 55        | 1.00        | 0.01        |
| 3.7       | 1.00        | 0.00        | 70        | 1.00        | 0.00        | 60        | 0.99        | 0.02        |
| 3.8       | 1.00        | 0.01        | 72        | 1.00        | 0.00        | 65        | 0.99        | 0.02        |
| 3.9       | 1.00        | 0.01        | 74        | 0.99        | 0.01        | 70        | 0.99        | 0.04        |
| 4.0       | 0.99        | 0.01        | 76        | 0.97        | 0.02        | 75        | 0.99        | 0.08        |
| 4.1       | 0.99        | 0.02        | 78        | 0.98        | 0.05        | 80        | 0.96        | 0.13        |
| 4.2       | 0.97        | 0.04        | 80        | 0.96        | 0.11        | 85        | 0.93        | 0.20        |
| 4.3       | 0.96        | 0.06        | 82        | 0.93        | 0.16        | 90        | 0.91        | 0.26        |
| 4.4       | 0.94        | 0.09        | 84        | 0.85        | 0.26        | 95        | 0.90        | 0.37        |
| 4.5       | 0.93        | 0.13        | 86        | 0.82        | 0.36        | 100       | 0.86        | 0.46        |
| 4.6       | 0.89        | 0.18        | 88        | 0.75        | 0.49        | 105       | 0.80        | 0.54        |
| 4.7       | 0.86        | 0.26        | 90        | 0.65        | 0.58        | 110       | 0.72        | 0.64        |
| 4.8       | 0.80        | 0.34        | 92        | 0.53        | 0.69        | 115       | 0.60        | 0.72        |
| 4.9       | 0.77        | 0.44        | 94        | 0.41        | 0.79        | 120       | 0.53        | 0.78        |
| 5.0       | 0.68        | 0.55        | 96        | 0.34        | 0.86        | 125       | 0.45        | 0.83        |

SUPPLEMENTARY DATA

|     |      |      |     |      |      |     |      |      |
|-----|------|------|-----|------|------|-----|------|------|
| 5.1 | 0.64 | 0.64 | 98  | 0.27 | 0.91 | 130 | 0.42 | 0.87 |
| 5.2 | 0.55 | 0.74 | 100 | 0.19 | 0.95 | 135 | 0.35 | 0.91 |
| 5.3 | 0.52 | 0.84 | 102 | 0.13 | 0.97 | 140 | 0.32 | 0.93 |
| 5.4 | 0.46 | 0.90 | 104 | 0.09 | 0.98 | 145 | 0.28 | 0.95 |
| 5.5 | 0.36 | 0.94 | 106 | 0.09 | 1.00 | 150 | 0.25 | 0.96 |
| 5.6 | 0.26 | 0.97 | 108 | 0.05 | 1.00 | 155 | 0.21 | 0.98 |
| 5.7 | 0.19 | 0.99 | 110 | 0.05 | 1.00 | 160 | 0.17 | 0.98 |
| 5.8 | 0.10 | 1.00 | 112 | 0.03 | 1.00 | 165 | 0.15 | 0.98 |
| 5.9 | 0.04 | 1.00 | 114 | 0.02 | 1.00 | 170 | 0.12 | 0.99 |
| 6.0 | 0.01 | 1.00 | 116 | 0.01 | 1.00 | 175 | 0.08 | 0.99 |
| 6.1 | 0.00 | 1.00 | 118 | 0.01 | 1.00 | 180 | 0.06 | 1.00 |
| 6.2 | 0.00 | 1.00 | 120 | 0.00 | 1.00 | 185 | 0.05 | 1.00 |
| 6.3 | 0.00 | 1.00 | 122 | 0.00 | 1.00 | 190 | 0.03 | 1.00 |
| 6.4 | 0.00 | 1.00 | 124 | 0.00 | 1.00 | 195 | 0.01 | 1.00 |

Men (n=797)

| HbA1c     |             |             | FPG       |             |             | 2-hPG     |             |             |
|-----------|-------------|-------------|-----------|-------------|-------------|-----------|-------------|-------------|
| Threshold | Sensitivity | Specificity | Threshold | Sensitivity | Specificity | Threshold | Sensitivity | Specificity |
| 3.4       | 1.00        | 0.00        | 64        | 1.00        | 0.00        | 45        | 1.00        | 0.01        |
| 3.5       | 1.00        | 0.00        | 66        | 0.99        | 0.00        | 50        | 0.99        | 0.01        |
| 3.6       | 1.00        | 0.00        | 68        | 0.99        | 0.00        | 55        | 0.99        | 0.04        |
| 3.7       | 1.00        | 0.00        | 70        | 0.99        | 0.00        | 60        | 0.98        | 0.06        |
| 3.8       | 1.00        | 0.00        | 72        | 0.99        | 0.01        | 65        | 0.93        | 0.12        |
| 3.9       | 1.00        | 0.01        | 74        | 0.99        | 0.02        | 70        | 0.90        | 0.15        |
| 4.0       | 1.00        | 0.01        | 76        | 0.99        | 0.02        | 75        | 0.87        | 0.21        |
| 4.1       | 0.99        | 0.02        | 78        | 0.98        | 0.03        | 80        | 0.82        | 0.25        |
| 4.2       | 0.99        | 0.02        | 80        | 0.97        | 0.05        | 85        | 0.76        | 0.31        |
| 4.3       | 0.98        | 0.03        | 82        | 0.93        | 0.08        | 90        | 0.74        | 0.39        |
| 4.4       | 0.96        | 0.06        | 84        | 0.91        | 0.13        | 95        | 0.68        | 0.47        |
| 4.5       | 0.95        | 0.10        | 86        | 0.86        | 0.19        | 100       | 0.64        | 0.56        |
| 4.6       | 0.91        | 0.14        | 88        | 0.82        | 0.28        | 105       | 0.58        | 0.64        |
| 4.7       | 0.90        | 0.21        | 90        | 0.74        | 0.37        | 110       | 0.54        | 0.70        |
| 4.8       | 0.85        | 0.30        | 92        | 0.67        | 0.46        | 115       | 0.48        | 0.73        |
| 4.9       | 0.78        | 0.40        | 94        | 0.61        | 0.57        | 120       | 0.42        | 0.80        |
| 5.0       | 0.72        | 0.51        | 96        | 0.55        | 0.65        | 125       | 0.39        | 0.85        |
| 5.1       | 0.68        | 0.60        | 98        | 0.45        | 0.75        | 130       | 0.32        | 0.89        |
| 5.2       | 0.62        | 0.70        | 100       | 0.34        | 0.82        | 135       | 0.28        | 0.92        |
| 5.3       | 0.54        | 0.78        | 102       | 0.25        | 0.88        | 140       | 0.24        | 0.94        |
| 5.4       | 0.43        | 0.85        | 104       | 0.21        | 0.90        | 145       | 0.19        | 0.96        |
| 5.5       | 0.34        | 0.90        | 106       | 0.15        | 0.92        | 150       | 0.15        | 0.97        |
| 5.6       | 0.23        | 0.94        | 108       | 0.13        | 0.95        | 155       | 0.12        | 0.98        |
| 5.7       | 0.17        | 0.97        | 110       | 0.10        | 0.97        | 160       | 0.09        | 0.98        |
| 5.8       | 0.12        | 0.99        | 112       | 0.08        | 0.98        | 165       | 0.08        | 0.99        |
| 5.9       | 0.08        | 0.99        | 114       | 0.06        | 0.98        | 170       | 0.06        | 0.99        |
| 6.0       | 0.05        | 1.00        | 116       | 0.05        | 0.99        | 175       | 0.04        | 0.99        |
| 6.1       | 0.03        | 1.00        | 118       | 0.04        | 0.99        | 180       | 0.03        | 1.00        |
| 6.2       | 0.02        | 1.00        | 120       | 0.02        | 0.99        | 185       | 0.02        | 1.00        |
| 6.3       | 0.01        | 1.00        | 122       | 0.01        | 0.99        | 190       | 0.01        | 1.00        |
| 6.4       | 0.00        | 1.00        | 124       | 0.00        | 1.00        | 195       | 0.00        | 1.00        |

SUPPLEMENTARY DATA

Women (n=1198)

| HbA1c     |             |             | FPG       |             |             | 2-hPG     |             |             |
|-----------|-------------|-------------|-----------|-------------|-------------|-----------|-------------|-------------|
| Threshold | Sensitivity | Specificity | Threshold | Sensitivity | Specificity | Threshold | Sensitivity | Specificity |
| 3.4       | 1.00        | 0.00        | 64        | 1.00        | 0.00        | 45        | 1.00        | 0.00        |
| 3.5       | 1.00        | 0.00        | 66        | 1.00        | 0.00        | 50        | 1.00        | 0.00        |
| 3.6       | 1.00        | 0.00        | 68        | 1.00        | 0.00        | 55        | 1.00        | 0.01        |
| 3.7       | 1.00        | 0.01        | 70        | 1.00        | 0.00        | 60        | 1.00        | 0.02        |
| 3.8       | 1.00        | 0.01        | 72        | 0.99        | 0.01        | 65        | 1.00        | 0.03        |
| 3.9       | 1.00        | 0.02        | 74        | 0.99        | 0.01        | 70        | 1.00        | 0.05        |
| 4.0       | 1.00        | 0.02        | 76        | 0.98        | 0.03        | 75        | 0.99        | 0.09        |
| 4.1       | 1.00        | 0.03        | 78        | 0.97        | 0.05        | 80        | 0.99        | 0.13        |
| 4.2       | 0.99        | 0.04        | 80        | 0.96        | 0.10        | 85        | 0.94        | 0.19        |
| 4.3       | 0.97        | 0.07        | 82        | 0.92        | 0.16        | 90        | 0.92        | 0.26        |
| 4.4       | 0.96        | 0.10        | 84        | 0.89        | 0.24        | 95        | 0.87        | 0.33        |
| 4.5       | 0.95        | 0.15        | 86        | 0.86        | 0.34        | 100       | 0.83        | 0.40        |
| 4.6       | 0.92        | 0.19        | 88        | 0.79        | 0.44        | 105       | 0.78        | 0.48        |
| 4.7       | 0.89        | 0.25        | 90        | 0.70        | 0.55        | 110       | 0.72        | 0.58        |
| 4.8       | 0.83        | 0.31        | 92        | 0.61        | 0.65        | 115       | 0.64        | 0.67        |
| 4.9       | 0.77        | 0.41        | 94        | 0.54        | 0.73        | 120       | 0.56        | 0.75        |
| 5.0       | 0.70        | 0.50        | 96        | 0.47        | 0.79        | 125       | 0.51        | 0.82        |
| 5.1       | 0.62        | 0.61        | 98        | 0.38        | 0.85        | 130       | 0.45        | 0.85        |
| 5.2       | 0.55        | 0.70        | 100       | 0.32        | 0.90        | 135       | 0.40        | 0.89        |
| 5.3       | 0.48        | 0.77        | 102       | 0.25        | 0.93        | 140       | 0.37        | 0.91        |
| 5.4       | 0.40        | 0.83        | 104       | 0.20        | 0.95        | 145       | 0.31        | 0.93        |
| 5.5       | 0.31        | 0.89        | 106       | 0.16        | 0.97        | 150       | 0.25        | 0.95        |
| 5.6       | 0.22        | 0.94        | 108       | 0.12        | 0.98        | 155       | 0.21        | 0.96        |
| 5.7       | 0.15        | 0.97        | 110       | 0.09        | 0.99        | 160       | 0.17        | 0.98        |
| 5.8       | 0.10        | 0.99        | 112       | 0.06        | 1.00        | 165       | 0.13        | 0.98        |
| 5.9       | 0.07        | 1.00        | 114       | 0.05        | 1.00        | 170       | 0.10        | 0.98        |
| 6.0       | 0.04        | 1.00        | 116       | 0.03        | 1.00        | 175       | 0.08        | 0.99        |
| 6.1       | 0.02        | 1.00        | 118       | 0.02        | 1.00        | 180       | 0.07        | 0.99        |
| 6.2       | 0.01        | 1.00        | 120       | 0.01        | 1.00        | 185       | 0.06        | 0.99        |
| 6.3       | 0.01        | 1.00        | 122       | 0.00        | 1.00        | 190       | 0.03        | 1.00        |
| 6.4       | 0.00        | 1.00        | 124       | 0.00        | 1.00        | 195       | 0.01        | 1.00        |

SUPPLEMENTARY DATA

**Supplementary Figure S1. Agreement of prediabetes definitions at baseline, in all individuals.** Individuals age-sex stratified into four groups: boys ages 10-19 (A), girls ages 10-19 (B), men ages 20-39 (C), and women ages 20-39 (D).

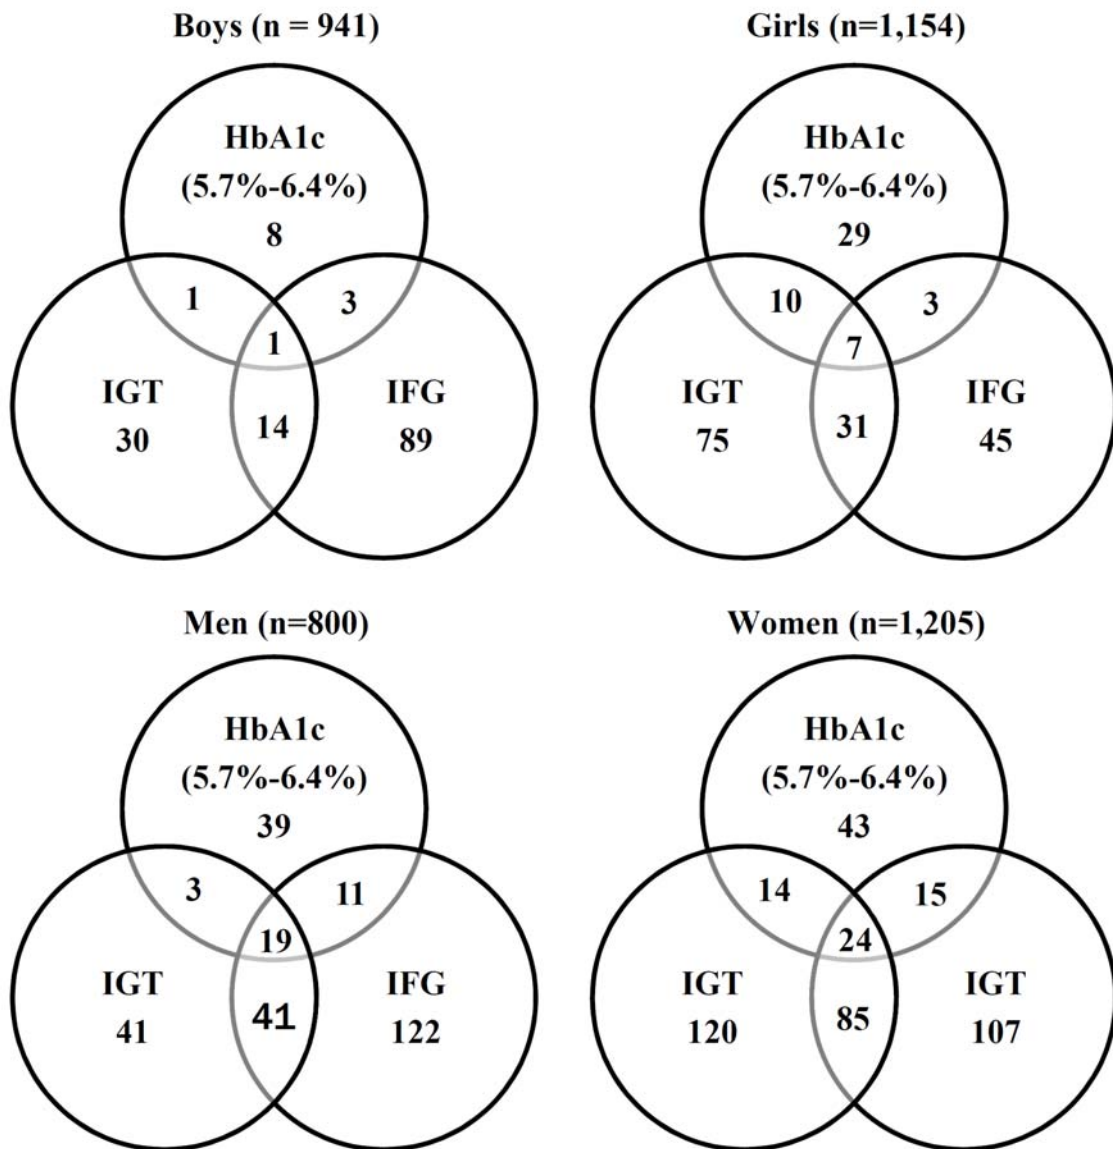

*IFG: Impaired Fasting Glucose; IGT: Impaired Glucose Tolerance*

SUPPLEMENTARY DATA

**Supplementary Figure S2. Agreement of prediabetes definitions at baseline, in individuals who subsequently developed T2DM.** Individuals age-sex stratified into four groups: boys ages 10-19 (A), girls ages 10-19 (B), men ages 20-39 (C), and women ages 20-39 (D).

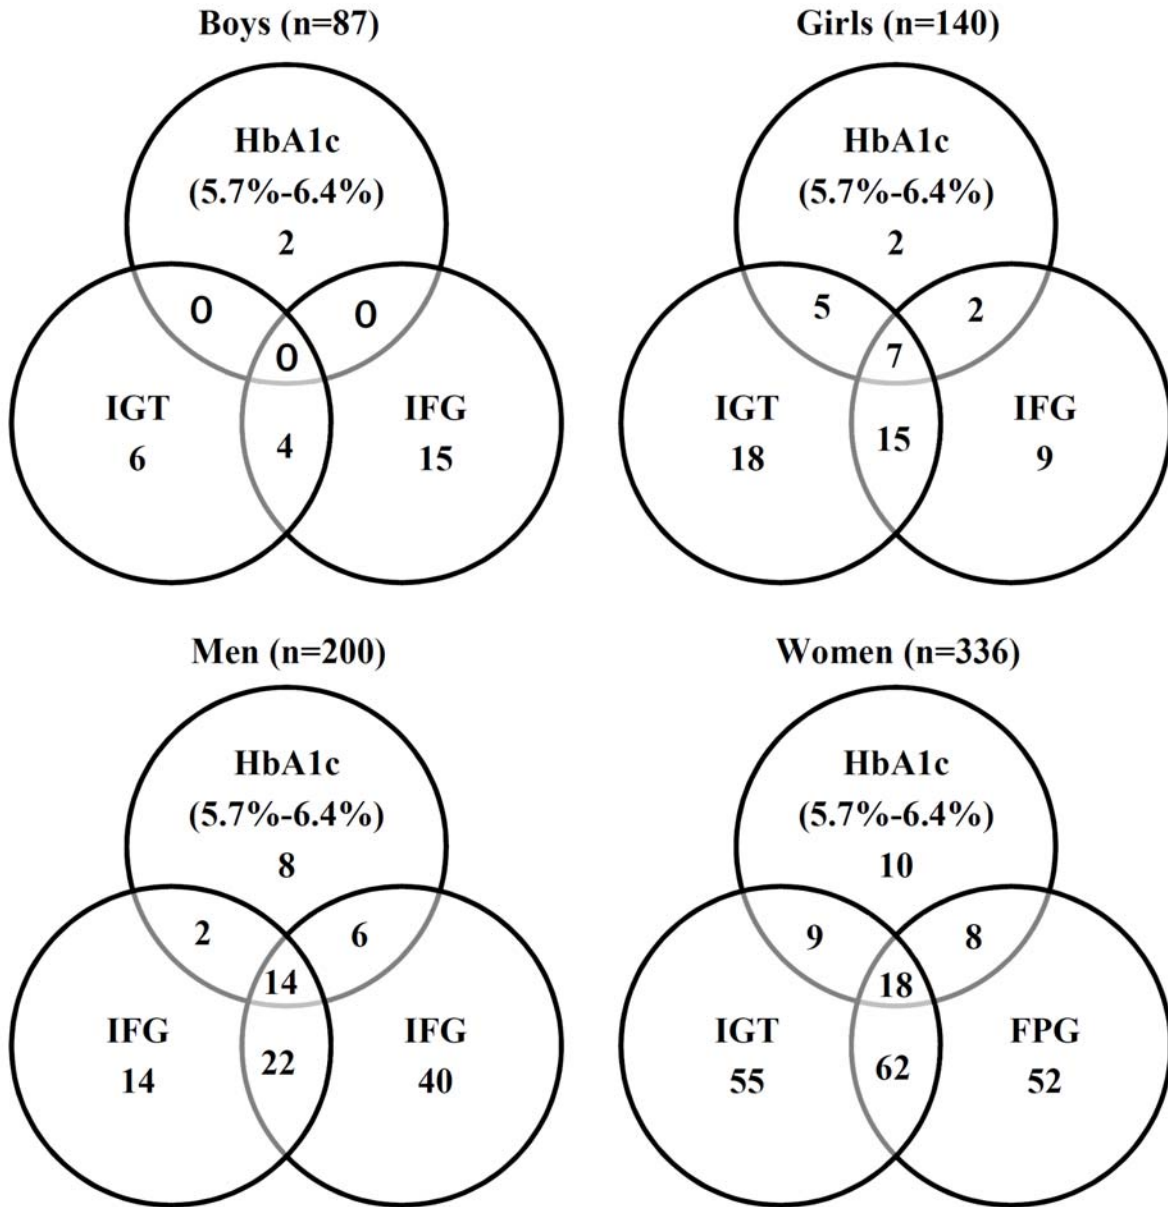

*IFG: Impaired Fasting Glucose; IGT: Impaired Glucose Tolerance*
